# Supplementary material for: Hypoxia-Induced Aquaporins and Regulation of Redox Homeostasis by a Trans-Plasma Membrane Electron Transport System in Maize Roots
Source: MDPI journal article supplement (doi:10.3390/antiox11050836), 2022-04-25
Supplement: s1 [file s1]

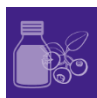

*Supplementary data*

# **Hypoxia-induced aquaporins and regulation of redox homeostasis by a trans-plasma membrane electron transport chain in maize roots**

Anne Hofmann <sup>1</sup>, Stefanie Wienkoop <sup>2</sup> and Sabine Lüthje <sup>1,\*</sup>

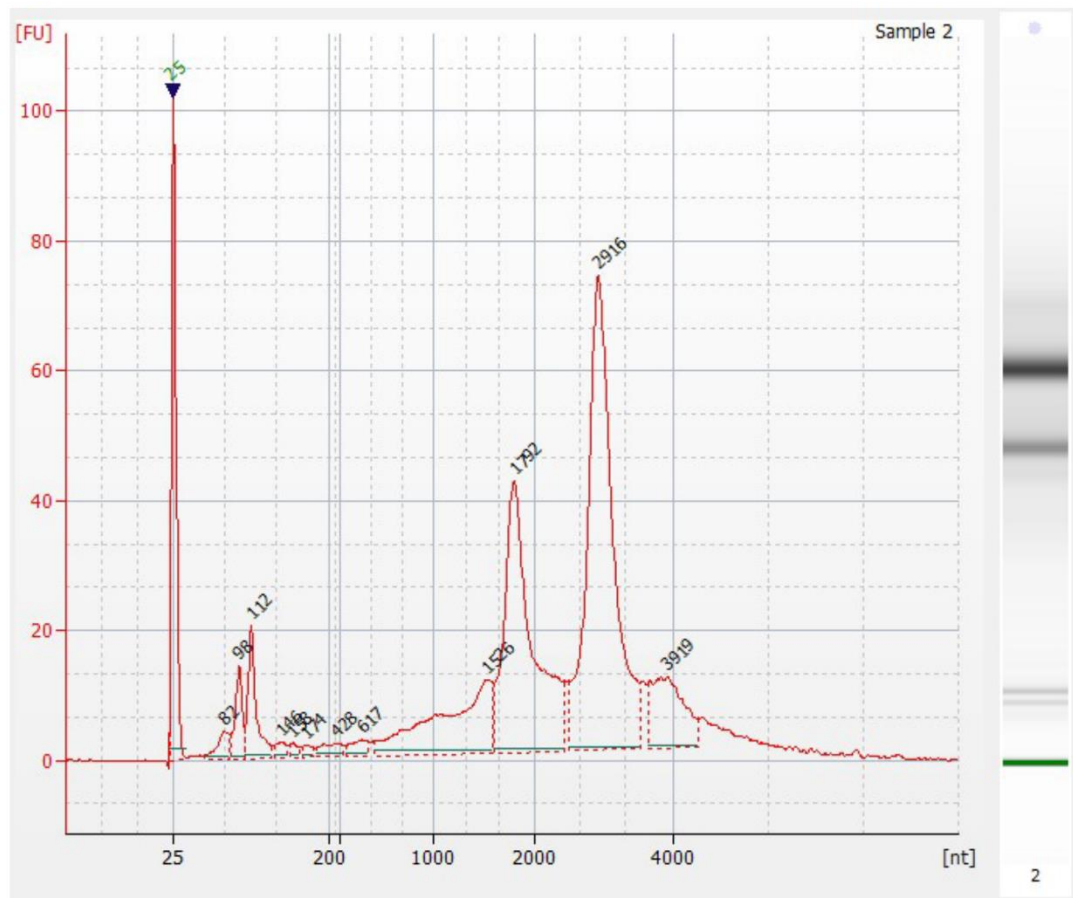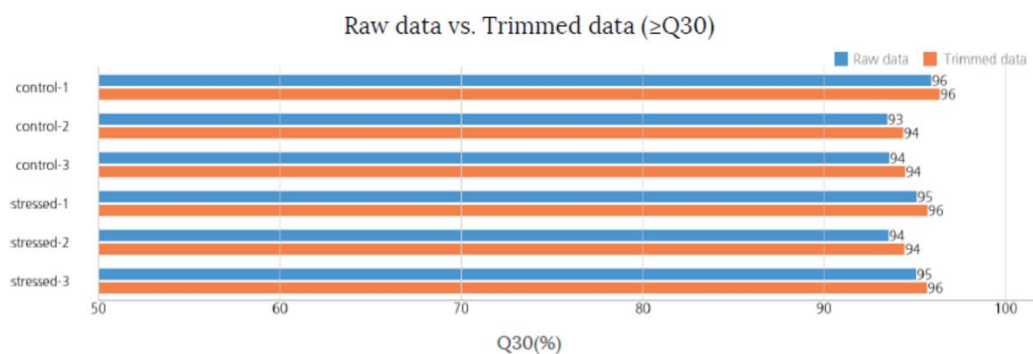

**Figure S1.** Quality control of RNA isolation and RNA-Seq data. Quality control of a representative RNA sample analysed with Bioanalyzer RNA Pico 6000 chip. In detail, MacroGen quantifies the starting genomic material by a fluorescence-based quantification done by Picogreen (Invitrogen, Waltham, USA) method using Victor 3 fluorometry. The company checked total RNA integrity using an Agilent Technologies 2100 Bioanalyzer. Only RNA samples with an RNA Integrity Number (RIN) value greater than or equal to 7 were used for RNA Sequencing. Gel electrophoresis, shown on the right, was used to reveal the condition (including the presence or absence) of DNA in the samples.

The Phred quality score measures the quality of the identification of the nucleobases generated by automated DNA sequencing. Here, this Q30 score (in %) is equivalent to the probability of 1 incorrect base call in 1000 times.

|          |                                                                 |        |
|----------|-----------------------------------------------------------------|--------|
| AtPIP2;4 | -----MAK---D---LDVNESGPPAARDYKDPAPFFDMEELRKWPLYRAVIAEF          | 45     |
| ZmPIP1;5 | MEGKEEDVRLGANRYSERQPIGTAAQGTEEKDYKEPPAPLFEAEELTSWSFYRAGIAEF     | 60     |
| ZmPIP2;1 | -----MGK---DDVIESGAGGGEFAAKDYTDPPAPLIDAAELGWSLYRAVIAEF          | 48     |
| ZmPIP2;2 | -----MGK---DDVVQSGAGGGEFAAKDYTDPPAPLVDAAELGWSLYRAVIAEF          | 48     |
| ZmPIP2;4 | -----MAK---DIEASGPEAGEFSAKDYTDPPAPLIDAEELTQWSLYRAVIAEF          | 47     |
| ZmPIP2;5 | -----MAK---DIEAAA---AHEGKDYSDPPAPLVDAAELTKWSLYRAVIAEF           | 43     |
| ZmPIP2;6 | -----MGK---EVDVSTLEAGGVDRDYADPPAPLIDIDELGKWSLYRAVIAEF           | 47     |
|          | :. : ** :*****: : ** . * :*** ****                              |        |
| Loop A   |                                                                 |        |
| AtPIP2;4 | VATLLFLYVSILTVIGYKAQTDATAGG---VDCGGVGILGIAWAFGGMI FVLVYCTAGI    | 101    |
| ZmPIP1;5 | VATFLFLYISILTMGVSKS-----SSKCATVGIQGIASFSFGGMI FALVYCTAGI        | 110    |
| ZmPIP2;1 | IATLLFLYITVATVIGYKHQTDASAS--GADAAACGGVGVLGIAWAFGGMI FVLVYCTAGI  | 106    |
| ZmPIP2;2 | IATLLFLYITVATVIGYKHQTDASASGAGADAAACGGVGVLGIAWAFGGMI FVLVYCTAGI  | 108    |
| ZmPIP2;4 | IATLLFLYITVATVIGYKHQTDASAS--GPDAAACGGVGILGIAWAFGGMI FILVYCTAGI  | 105    |
| ZmPIP2;5 | VATLLFLYITVATVIGYKHQTDAAAS--GPDAAACGGVGVLGIAWAFGGMI FILVYCTAGV  | 101    |
| ZmPIP2;6 | VATLLFLYITVATVIGYKHQTDASAS--GPDAAACGGVGILGIAWAFGGMI FILVYCTAGI  | 105    |
|          | :**:* ***: : ** * :***** *****:                                 |        |
| Loop B   |                                                                 | Loop C |
| AtPIP2;4 | SGGHI NPA VTFGLF LARKVSLVRTVLYIVAQCLGALCGCGFVKAFQSSYYTRYGGGANEL | 161    |
| ZmPIP1;5 | SGGHI NPA VTFGLF LARKVSLTRALFYMVMQCLGALCGAGVVKGFQEGLYMGAGGGANAV | 170    |
| ZmPIP2;1 | SGGHI NPA VTFGLF LARKVSLVRALLYIVAQCLGALCGVGLVKAFQSAYFDRYGGGANSL | 166    |
| ZmPIP2;2 | SGGHI NPA VTFGLF LARKVSLVRALLYMVAQCLGALCGVGLVKAFQSAYFDRYGGGANSL | 168    |
| ZmPIP2;4 | SGGHI NPA VTFGLF LARKVSLVRALLYIIAQCLGALCGVGLVKGFQSAYYVRYGGGANEL | 165    |
| ZmPIP2;5 | SGGHI NPA VTFGLF LARKVSLVRALLYIVAQCLGALCGVGLVKGFQSAFYVRYGGGANEL | 161    |
| ZmPIP2;6 | SGGHI NPA VTFGLF LARKVSLVRALLYMAAQSLGALCGVALVKGFQSGFYARYGGGANEV | 165    |
|          | *****.*****:*.*: :*: * :***: ** ..**.*. : ***** :               |        |
| Loop D   |                                                                 |        |
| AtPIP2;4 | ADGYNKG TGLGAEIIGTFVLVYTVFSATDPKRNARDSHVPVLAPLPIGFAVFMVHLATIP   | 221    |
| ZmPIP1;5 | NPGYTKG DGLGAEIVGTFLVYTVFSATDAKRSARDSHVPILAPLPIGFAVFLVHLATIP    | 230    |
| ZmPIP2;1 | ASGYSRG TGLGAEIIGTFVLVYTVFSATDPKRNARDSHVPVLAPLPIGFAVFMVHLATIP   | 226    |
| ZmPIP2;2 | ASGYSRGAGLGAEIVGTFLVYTVFSATDPKRNARDSHVPVLAPLPIGFAVFMVHLATIP     | 228    |
| ZmPIP2;4 | SDGYSKG TGLAAEIIIGTFVLVYTVFSATDPKRSARDSHVPVLAPLPIGFAVFMVHLATIP  | 225    |
| ZmPIP2;5 | SAGYSKG TGLAAEIIIGTFVLVYTVFSATDPKRNARDSHVPVLAPLPIGFAVFMVHLATIP  | 221    |
| ZmPIP2;6 | SAGYSTG TGLAAEIIIGTFVLVYTVFSATDPKRNARDSHVPVLAPLPIGFAVFMVHLATIP  | 225    |
|          | * * . * * . * * :***** ***** * * .*****:*****:*****             |        |
| Loop E   |                                                                 |        |
| AtPIP2;4 | ITGTGINPARSFGAAVIYNNEKAWDDQWIFWVGPMIGAAAAAFYHQFILRAAAIKALGSF    | 281    |
| ZmPIP1;5 | ITGTGINPARSLGAAIVYNRSHAWNDHWIFWVGPFIGAALAAIYHVVIIRALPFKSRD--    | 288    |
| ZmPIP2;1 | VTGTGINPARSLGAAVIYNKDKPWDDHWIFWVGPLVGAAIAAFYHQYILRAGAIKALGSF    | 286    |
| ZmPIP2;2 | VTGTGINPARSLGAAVVYNKDKPWDDHWIFWVGPLLGAAIAAFYHQYILRAGAIKALGSF    | 288    |
| ZmPIP2;4 | ITGTGINPARSLGAAVIYNKDKAWDDQWIFWVGPLIGAAIAAAYHQYVLRASAT-KLGSY    | 284    |
| ZmPIP2;5 | ITGTGINPARSLGAAVIYNNDKAWDDHWIFWVGPFIGAIAAAYHQYVLRASAA-KLGSS     | 280    |
| ZmPIP2;6 | ITGTGINPARSLGAAVVYNNKAWSDQWIFWVGPFIGAIAAALYHQIVLRASAR-GYGSF     | 284    |
|          | :*****:***:*.*: :*.*:*****:*** ** * :***                        |        |
| AtPIP2;4 | GSFGSFRSFA                                                      | 291    |
| ZmPIP1;5 | -----                                                           | 288    |
| ZmPIP2;1 | RSNA-----                                                       | 290    |
| ZmPIP2;2 | RSNA-----                                                       | 292    |
| ZmPIP2;4 | RSNA-----                                                       | 288    |
| ZmPIP2;5 | ASFSR-----                                                      | 285    |
| ZmPIP2;6 | RSNA-----                                                       | 288    |

**Figure S2.** CLUSTAL O (1.2.4) multiple sequence alignment of PIPs. Alignment of *AtPIP2;4* (Q9FF53), *ZmPIP1;5* (GRMZM2G081843), *ZmPIP2;1* (GRMZM2G014914), *ZmPIP2;2* (GRMZM2G092125), *ZmPIP2;4* (GRMZM2G154628), *ZmPIP2;5* (GRMZM2G178693), and *ZmPIP2;6* (GRMZM2G047368). Indicated are loops A, B, C, and D (cyan), the four residues involved in the selectivity filter of the channel (yellow), the NPA motif (green), and cysteine residues (blue). Sequence of *AtPIP2;4* was taken from [112].

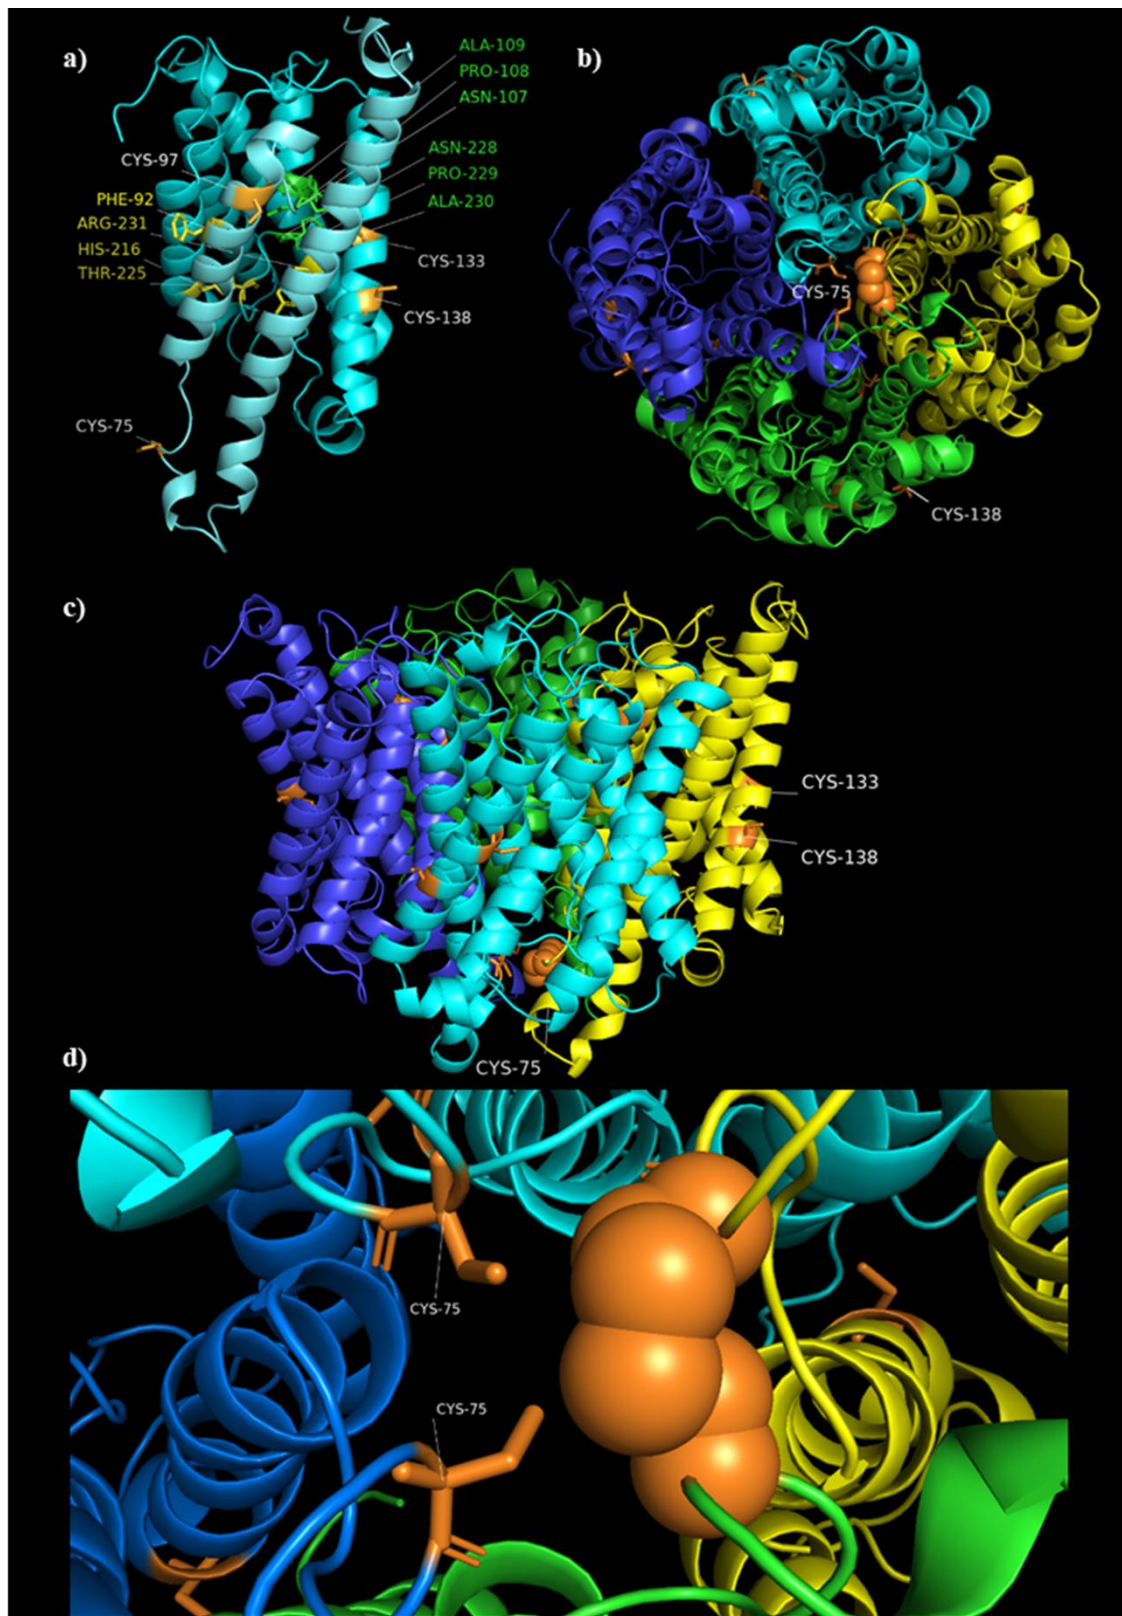

**Figure S3.** Hypothetical model of ZmPIP2;5. Tertiary structure of ZmPIP2;5 was modelled by Swiss-Model using spinach (*Spinacia oleracea* L.) aquaporin SoPIP2;1 (4jc6.2.A) as the template [152]. Shown are **a)** the monomer with the two NPA motifs (green), the four residues involved in the selectivity filter of the channel (yellow) and the four cysteine residues, **b)** the homo tetramer top view and **c)** side view, and **d)** the disulphide bond (spheres, orange) between two Cys-75 of two monomers inside the homo tetramer. Monomers (green, yellow, cyan and marine), cysteine (orange). Visualisation of the hypothetical tertiary structure by PyMOL vers. 2.4.1
